# Supplementary material for: Inclusion of Soluble Fiber During Gestation Regulates Gut Microbiota, Improves Bile Acid Homeostasis, and Enhances the Reproductive Performance of Sows
Source: PubMed Central journal article supplement (PMC8635514; doi:10.3389/fvets.2021.756910), 2021-11-17
Supplement: Data_Sheet_1.pdf [file Data_Sheet_1.pdf]

**Supplementary Table S1.** Ingredients and nutrient composition of experimental gestation diets (as-fed basis).

| Items                          | CON   | GCW   |
|--------------------------------|-------|-------|
| Ingredient, %                  |       |       |
| Corn                           | 54.80 | 54.80 |
| Soybean meal, 43%CP            | 11.50 | 11.50 |
| Wheat bran                     | 0.00  | 0.00  |
| Soybean hull                   | 14.00 | 14.00 |
| Rice bran meal                 | 16.00 | 14.00 |
| Calcium carbonate              | 1.20  | 1.20  |
| Dicalcium phosphate            | 1.00  | 1.00  |
| Salt                           | 0.40  | 0.40  |
| Mildewcide <sup>2</sup>        | 0.10  | 0.10  |
| Choline chloride               | 0.00  | 0.00  |
| Fiber source                   | 0.00  | 2.00  |
| Premix <sup>3</sup>            | 1.00  | 1.00  |
| Nutrient composition           |       |       |
| Net energy, MJ/kg <sup>4</sup> | 9.53  | 9.53  |
| Crude protein, %               | 13.96 | 13.81 |
| ISF, % <sup>5</sup>            | 26.95 | 26.78 |
| GCW, % <sup>6</sup>            | 2.85  | 4.04  |
| NDF, % <sup>7</sup>            | 20.29 | 20.21 |
| ADF, % <sup>8</sup>            | 5.47  | 5.42  |
| Lys, % <sup>4</sup>            | 0.59  | 0.59  |
| Ca, % <sup>4</sup>             | 0.78  | 0.75  |
| Available P, % <sup>4</sup>    | 0.40  | 0.40  |

<sup>1</sup>GCW = 2% fiber of pregelatinized waxy maize starch (85.7%) plus guar gum (14.3%).

<sup>2</sup>Mildewcide: ammonium propionate.

<sup>3</sup>Provided per kg of diet: Cu, 30 mg; Fe, 160 mg; Zn, 160 mg; Mn, 55 mg; I, 0.5 mg; Se, 0.5 mg; Co, 0.8 mg; Cr, 0.2 mg; Vitamin A, 14000 IU; Vitamin D<sub>3</sub>, 2900 IU; Vitamin E, 120 mg; Vitamin K<sub>3</sub>, 6 mg; Vitamin B<sub>1</sub>, 2.4 mg; Vitamin B<sub>2</sub>, 8.5 mg; Vitamin B<sub>6</sub>, 4.5 mg; Vitamin B<sub>12</sub>, 0.03 mg; Vitamin H, 0.55 mg; Pantothenic acid, 30 mg; Folic acid, 5 mg; Nicotinamide, 50 mg.

<sup>4</sup>Calculated chemical concentrations using values for feed ingredients from the NRC (2012).

<sup>5</sup>insoluble fiber.

<sup>6</sup>solubel fiber.

<sup>7</sup>neutral detergent fiber.

<sup>8</sup>acid detergent fiber.

**Supplementary Table S2.** Primers used for real-time PCR analysis in this study.

| Target gene    | Forward primer (5'-3') | Reverse primer (5'-3') | Annealing temp.(°C) | Reference                      |
|----------------|------------------------|------------------------|---------------------|--------------------------------|
| Total bacteria | GTGSTGCAYGGYYGTCGTCA   | ACGTCRTCCMCNCCTTCCTC   | 60                  | Maeda <i>et al.</i> , 2003     |
| <i>baiJ</i>    | TCAGGACGTGGAGGCGATCCA  | TACRTGATACTGGTAGCTCCA  | 60                  | Yoshimoto <i>et al.</i> , 2013 |
| <i>bsh1</i>    | ATGGGCGGACTAGGATTACC   | TGCCACTCTCTGTCTGCATC   | 54                  | Duary <i>et al.</i> , 2012     |
| <i>bsh2</i>    | AATCGGCTCATCTGCACCAA   | GTGGTCACGCAGGATAGAGG   | 60                  | This study                     |

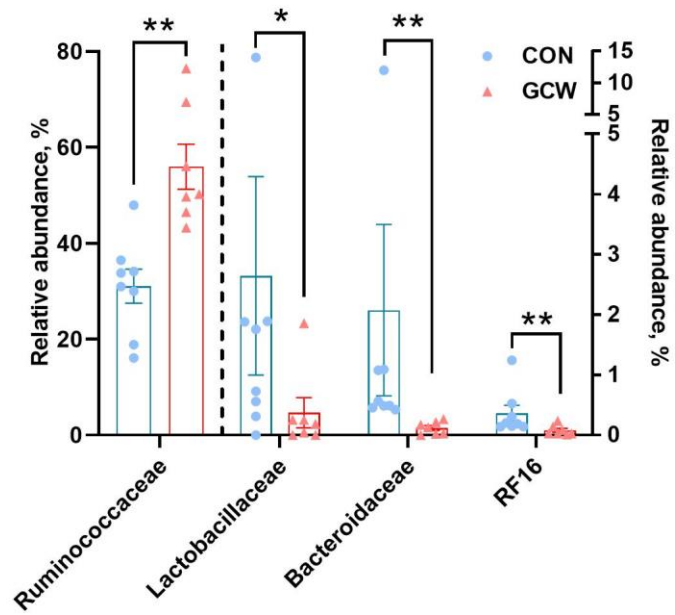

**Supplementary Figure. S1.** Significantly changed bacteria at family level between control (n = 8) and GCW (n = 7) groups. Data are shown as means  $\pm$  SEM. \* $p < 0.05$ , \*\* $p < 0.01$ .

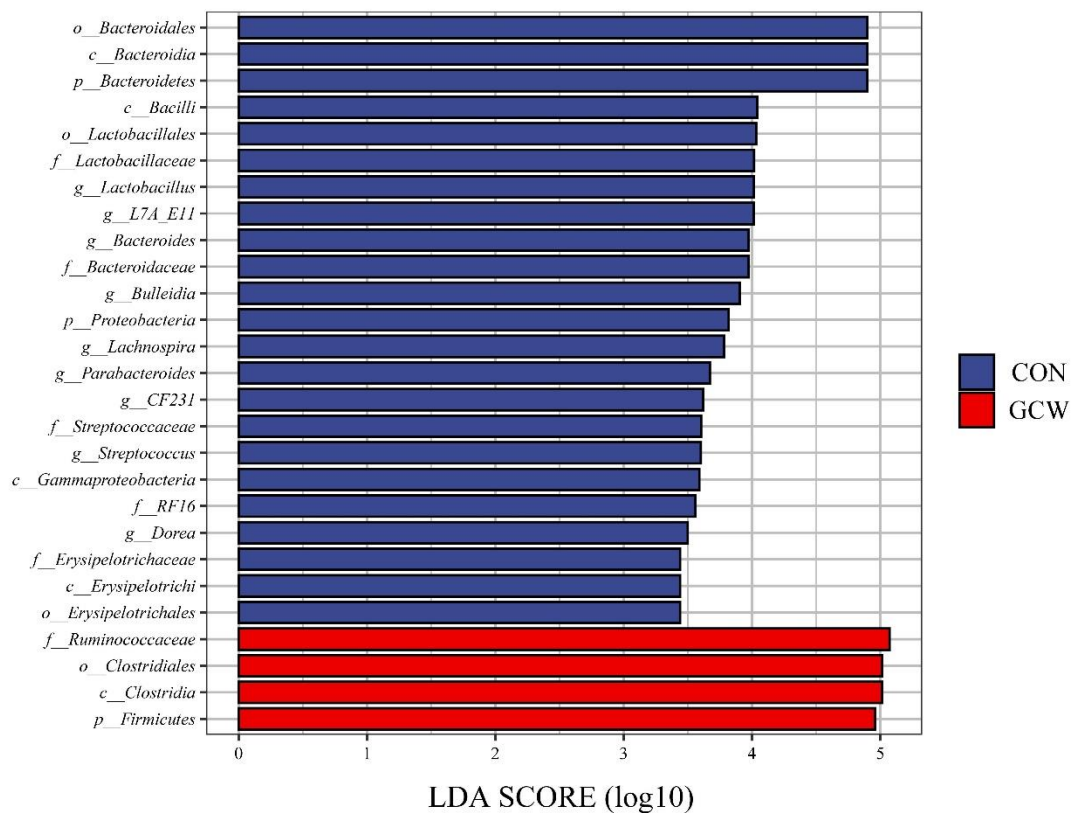

**Supplementary Figure. S2.** LEfSe analysis of gut microbiota between two groups. Blue shaded areas indicate CON-enriched taxa and red shaded areas indicate SF-enriched taxa.
